# Supplementary material
Source: ML conference proceedings conference paper supplement (https://proceedings.mlr.press/v70/suresh17a.html)
Supplement: Supplementary file 1 [file suresh17a-supp.pdf]

## A. Proof of Lemma 7

The equality follows from the symmetry in  $HD$ . To prove the upper bound, observe that

$$\mathbb{E} [(Z_i^{\max})^2] = \text{Var} (Z_i^{\max}) + (\mathbb{E} [Z_i^{\max}])^2.$$

Let  $D(j)$  be the  $j^{\text{th}}$  diagonal entry of  $D$ . To bound the first term observe that  $Z_i^{\max}$  is a function of  $d$  independent random variables  $D(1), D(2), \dots, D(d)$ . Changing  $D(j)$  changes the  $Z_i^{\max}$  by at most  $\frac{2X_i(j)}{\sqrt{d}}$ . Hence, applying Efron-Stein variance bound (Efron & Stein, 1981) yields

$$\text{Var} (Z_i^{\max}) \leq \sum_{j=1}^d \frac{4X_i^2(j)}{2d} = \frac{2\|X_i\|_2^2}{d}.$$

To bound the second term, observe that for every  $\beta > 0$ ,

$$\beta Z_i^{\max} = \log \exp (\beta Z_i^{\max}) \leq \log \left( \sum_{j=1}^d e^{\beta Z_i(j)} \right).$$

Note that  $Z_i(k) = \frac{1}{\sqrt{d}} \sum_{j=1}^d D(j)H(k, j)X_i(j)$ . Since the  $D(j)$ 's are Radamacher random variables and  $|H(k, j)| = 1$  for all  $k, j$ , the distributions of  $Z_i(k)$  is same for all  $k$ . Hence by Jensen's inequality,

$$\begin{aligned} \mathbb{E} [Z_i^{\max}] &\leq \frac{1}{\beta} \mathbb{E} \left[ \log \left( \sum_{j=1}^d e^{\beta Z_i(j)} \right) \right] \\ &\leq \frac{1}{\beta} \log \left( \sum_{j=1}^d \mathbb{E} [e^{\beta Z_i(j)}] \right) = \frac{1}{\beta} \log (d \mathbb{E} [e^{\beta Z_i(1)}]). \end{aligned}$$

Since  $Z_i(1) = \frac{1}{\sqrt{d}} \sum_{j=1}^d D(j)X_i(j)$ ,

$$\begin{aligned} \mathbb{E} [e^{\beta Z_i(1)}] &= \mathbb{E} \left[ e^{\frac{\beta \sum_j D(j)X_i(j)}{\sqrt{d}}} \right] \stackrel{(a)}{=} \prod_{j=1}^d \mathbb{E} \left[ e^{\frac{\beta D(j)X_i(j)}{\sqrt{d}}} \right] \\ &= \prod_{j=1}^d \frac{e^{-\beta X_i(j)/\sqrt{d}} + e^{\beta X_i(j)/\sqrt{d}}}{2} \\ &\stackrel{(b)}{\leq} \prod_{j=1}^d e^{\beta^2 X_i^2(j)/2d} = e^{\beta^2 \|X_i\|_2^2 / 2d}, \end{aligned}$$

where (a) follows from the fact that the  $D(i)$ 's are independent and (b) follows from the fact that  $e^a + e^{-a} \leq 2e^{a^2/2}$  for any  $a$ . Hence,

$$\mathbb{E} [Z_i^{\max}] \leq \min_{\beta \geq 0} \frac{\log d}{\beta} + \frac{\beta \|X_i\|_2^2}{2d} \leq \frac{2\|X_i\|_2 \sqrt{\log d}}{\sqrt{2d}}.$$
